# Supplementary material for: The Unicellular, Parasitic Fungi, Sanchytriomycota, Possess a DNA Sequence Possibly Encoding a Long Tubulin Polymerization Promoting Protein (TPPP) but Not a Fungal-Type One
Source: MDPI journal article supplement (doi:10.3390/microorganisms11082029), 2023-08-07
Supplement: s1 [file s1]

**Table S1.** Accession Numbers of proteins shown in Figure 6<sup>1</sup>

| Name on the Figure | Species                             | Phylum                        | NCBI Accession No.           |
|--------------------|-------------------------------------|-------------------------------|------------------------------|
| Monosiga           | <i>Monosiga brevicollis</i>         | Choanoflagellata <sup>2</sup> | XP_001743131                 |
| Homo               | <i>Homo sapiens</i>                 | Chordata                      | NP_057048                    |
| Drosophyla         | <i>Drosophila melanogaster</i>      | Arthropoda                    | NP_648881                    |
| Caenorhabditis     | <i>Caenorhabditis elegans</i>       | Nematoda                      | NP_491219                    |
| ROZELLA            | <i>Rozella allomyces</i>            | Rozellomycota                 | EPZ30999                     |
| GONAPODYA          | <i>Gonapodya</i> sp. JEL0774        | Monoblepharomycota            | KAJ3339789                   |
| Chytriomycetes     | <i>Chytriomycetes</i> sp. MP71      | Chytridiomycota               | KAI8613955                   |
| Chytriomycetes0    | <i>Chytriomycetes confervae</i>     | Chytridiomycota               | TPX78276                     |
| CHYTRIOMYCES1      | <i>C. confervae</i>                 | Chytridiomycota               | TPX65886                     |
| CHYTRIOMYCES2      | <i>C. confervae</i>                 | Chytridiomycota               | TPX72533                     |
| Obelidium          | <i>Obelidium mucronatum</i>         | Chytridiomycota               | KAI9342551                   |
| OBELIDIUM1         | <i>O. mucronatum</i>                | Chytridiomycota               | KAI9351240                   |
| OBELIDIUM2         | <i>O. mucronatum</i>                | Chytridiomycota               | KAI9342285                   |
| RHIZOCLOSMATIUM1   | <i>Rhizoclosmatium globosum</i>     | Chytridiomycota               | KAJ3297182                   |
| RHIZOCLOSMATIUM2   | <i>R. globosum</i>                  | Chytridiomycota               | ORY45507                     |
| SPIZELLOMYCES      | <i>Spizellomyces punctatus</i>      | Chytridiomycota               | XP_016604112                 |
| GORGONOMYCES       | <i>Gorgonomycetes haynaldii</i>     | Chytridiomycota               | KAI8912588                   |
| GorgonomycetesA    | <i>G. haynaldii</i>                 | Chytridiomycota               | KAI8912823                   |
| GorgonomycetesB    | <i>G. haynaldii</i>                 | Chytridiomycota               | KAI8906053                   |
| Globomyces         | <i>Globomyces pollinis-pini</i>     | Chytridiomycota               | KAI8895260                   |
| CAULOCYTRIUM       | <i>Caulocytrium protostelioides</i> | Chytridiomycota               | RKP02545                     |
| OLPIDIUM           | <i>Olpidium bornovanus</i>          | Olpidiomycota                 | KAG5460860+                  |
| APHELIDIUMi        | <i>Aphelidium insulamus</i>         | Aphelidiomycota               | KAG5458366                   |
| APHELIDIUMt        | <i>Aphelidium tribonematis</i>      | Aphelidiomycota               | Cf. Fig. S2                  |
| PARAPHELIDIUM      | <i>Paraphelidium tribonematis</i>   | Aphelidiomycota               | Cf. Fig. S2                  |
|                    |                                     |                               | TRINITY_DN24782 <sup>3</sup> |

<sup>1</sup>Accession Numbers listed in Table 1 and Table 2 are not shown here. <sup>2</sup>Class. <sup>3</sup><https://doi.org/10.6084/m9.figshare.7339469.v1> (accessed on 14 November 2022).

*Aphelidium insulamus*

>O14\_transcripts\_NODE\_20210.p3 type: complete length:159

gc: universal O14\_transcripts\_NODE\_20210:67-543(+)

MS**LAHAFESFATF**GAPNTQGPVTMDNAHFAKLCRDAHIVDKRVTAVDVDITFKQVLTKGSRRITFDQFQQGLQTLATKK  
YAAAQLSDEEALKRITALVVNAAPTSSGTTADTAGIFSKLTDASQYTGSHRSRFDEN**GNGLGLAGRD**THTRTANLSQMV  
\*

>O14\_transcripts\_NODE\_21726.p1 type: complete length:292

gc: universal O14\_transcripts\_NODE\_21726:67-942(+)

MS**LAHAFESFATF**GAPNTQGPVTMDNAHFAKLCRDAHIVDKRVTAVDVDITFKQVLTKGSRRITFDQFQQGLQTLATKK  
YAAAQLSDEEALKRITALVVNAAPTSSGTTADTAGIFSKLTDASQYTGSHRSRFDEN**GNGLGLAGRD**THTRTANLSQMV  
DRSIKVPAPTSTGKRTVTLSMEEMNHQKPSSSGRRVVKPASTTPKKGPTSIGARGTVSASAQSLAKPRQANVTGSSTS  
MAAKSVSGSGSVYDRLTDSKGYTGTHKHFDDT**GKGRGMLGRD**HPTTSQILRST

*Aphelidium tribonematis*

>P2\_transcripts\_NODE\_21635.p1 type:5prime\_partial length:297

gc: universal P2\_transcripts\_NODE\_21635:956-66(-)

FSPKSKLHKLI**MSLSHAFEAFATF**GAPSTQGPVTMDNAHFAKLCRDARIVDKRVTSDVDITFKQVLTKGARRITDAQF  
QQALKVLAAKKYGSNVSEADALQKISALVTQAAPVSNNGTAADASGIFAKLTDTTKYTGHAHRSRFDEN**GNGLGLAGRETH**  
VRTANLSDMVDRSLSKPAAPQKRTVTLSMEEMNQQRSSAGQRVVKPASTPKKNAAFPAKSKVGSSSQSLAKPRQTNV  
SASANSLSAKSQGGSGNVYDRLTDSKQYTGTHKHFDDT**GKGRGLAGRD**QPTSSQILRS\*

>P2\_transcripts\_NODE\_23454.p1 type:3prime\_partial length:275

gc: universal P2\_transcripts\_NODE\_23454:823-2(-)

MS**LAHAFESFATF**GAPNTQGPVTMDNAHFAKLCRDAHIVDKRVTAVDVDITFKQVLTKGSRRITFDQFQQGLQTLATKK  
YAAAQLSDEEALKRITALVVNAAPTSSGTTADTAGIFSKLTDASQYTGSHRSRFDEN**GNGLGLAGRD**THTRTANLSQMV  
DRSIKVPAPTSTGKRTVTLSMEEMNHQKPASSGRRVVKPASTTPKKGPTSIGARGTVSASAQSLAKPRQANVTGSSTS  
MAAKSVSGSGSVYDRLTDSKGYTGTHKHFDDT**GKGR**

**Figure S1.** Sequences of *Aphelidium* TPPPs. The sequences were retrieved from

[https://figshare.com/projects/Aphelida\\_Extended\\_Data/111539](https://figshare.com/projects/Aphelida_Extended_Data/111539), on 17 March 2023. Green and blue background

indicates the *A. insulamus* and *A. tribonematis* sequences, respectively, used for phylogenetic analysis (Figure 6). Bold letters indicate the p25alpha domains; red letters indicate the LxxxFxxFxxF and GxGxGxxGR conservative sequences.
